# Supplementary material for: A systematic evaluation of nucleotide properties for CRISPR sgRNA design
Source: PubMed Central journal article supplement (PMC5461693; doi:10.1186/s12859-017-1697-6), 2017-06-06
Supplement: 12859_2017_1697_MOESM1_ESM.pdf [file 12859_2017_1697_MOESM1_ESM.pdf]

## RESEARCH

# Supplementary Information: A systematic evaluation of nucleotide properties for CRISPR sgRNA design

Pei Fen Kuan<sup>1\*</sup>, Scott Powers<sup>2</sup>, Shuyao He<sup>1</sup>, Kaiqiao Li<sup>1</sup>, Xiaoyu Zhao<sup>2</sup> and Bo Huang<sup>3</sup>

\*Correspondence:

peifen.kuan@stonybrook.edu

<sup>1</sup>Department of Applied Mathematics and Statistics, Stony Brook University, Nicolls Road, Stony Brook, USA

Full list of author information is available at the end of the article

## Candidate feature ranking

Figures S1 and S2 displayed the candidate feature ranking by the Bayesian Information Criterion (BIC) and variable importance score from the random forest prediction algorithm, respectively. The top ranked feature based on both criteria across the three datasets was the 16-th feature from PseKNC model. This feature is a function of TT dinucleotide frequency.

## Results from other prediction algorithms

We also compared the results using the random forest and boosted regression to construct the predictive model. Random forest [1] was implemented in the R package `randomForest`, whereas the boosted regression based on extensions to AdaBoost [2] and gradient boosted machine [3] was implemented in the R package `gbm`. The results were shown in Tables S1, S2, S3 (`randomForest`) and Tables S4, S5, S6 (`gbm`). These results were comparable to the results from elastic net in the main text.

## Results from regression model

The regression model were constructed based on (1) the average log<sub>2</sub> fold change (12 cell doublings vs initial seeding states) of HL-60 and KBM-7 cell lines for [4] data and (2) the average log<sub>2</sub> fold change (mESC vs plasmid control) of replicate 1 and replicate 2 of mouse ESC JM8 cell lines for [5] data. We compared the performance of the sequence properties in prediction in terms of AUC, Youden index, sensitivity, specificity; as well as Pearson correlation coefficient, Spearman rank correlation coefficient and mean squared error on the test data. The results based on elastic net were presented in Tables S7, S8 and S9. [6, 7] showed that the regression model outperformed classification model using their dataset [7]. However, we observed that the regression model and classification model yielded comparable performance in both [4] and [5] datasets. The combination feature prediction model from regression model (Comb Feature) exhibited larger AUC than both `azimuth` and `sgRNA scorer` ( $p < 0.001$  for all pairwise AUC comparisons using DeLong's test [8]); but no difference using Spearman rank correlation coefficient for Comb Feature versus `azimuth` ( $p = 0.88$  from Fisher's  $Z$ -transformation test [9, 10]) in Table S9. We also included the results from random forest and boosted regression. The results were shown in Tables S10, S11, S12 (`randomForest`) and Tables S13, S14, S15 (`gbm`). These results were comparable to the results from elastic net.

## Results comparing 40 bp and 30 bp sequence

In this section, we compared the performance of our prediction model of the 40 bp sequence encompassing 5' flanking (10 bp), spacer target and 3' flanking (NGG + 7 bp) region defined by [11] against 30 bp sequence (5' flanking (4 bp), spacer target and 3' flanking (NGG + 3 bp) region) as in [12, 6, 7]. Since Thermo, Packer, PhyChem, PseKNC and Align were computed for the spacer target sequence only, thus these properties were identical regardless whether 40 bp or 30 bp sequence was used, we reported the results for position dependent mono and dinucleotides in Tables S16, S17 and S18. The results indicated that the performance of the prediction models were comparable regardless whether a 40 bp or 30 bp sequence was used.

## Results from leave-one-gene out prediction

Following [6, 7], we also included the results from leave-one-gene out prediction framework to obtain a generalization of our prediction model to new genes. Table S19 displayed the results from leave-one-gene out in dataset 1 (58 ribosomal genes). Table S20 displayed the results from leave-one-gene out in [4] dataset (dataset 1+ dataset 2) (220 genes).

### Funding

This work was supported in part by NIH grant U01CA168409 to S.P. The funding body had no role in the design, collection, analysis or interpretation of this study.

### Competing interests

The authors declare that they have no competing interests.

### Author's contributions

P.K. conceived and designed the study. P.K., S.H. and K.L. carried out analyses and wrote the software. P.K., S.P., S.H., K.L., X.Z. and B.H. wrote the paper. P.K., S.P., X.Z. and B.H. critically read the manuscript and contributed to the discussion of the whole work. All authors read and approved of the final version of the manuscript.

### Author details

<sup>1</sup>Department of Applied Mathematics and Statistics, Stony Brook University, Nicolls Road, Stony Brook, USA.

<sup>2</sup>Department of Pathology, Stony Brook University, Nicolls Road, Stony Brook, USA. <sup>3</sup>Oncology Business Unit, Pfizer Inc., Eastern Point Rd, Groton, USA.

### References

- Breiman, L.: Random forests. *Journal of Machine Learning* **45**(1), 5–32 (2001)
- Freund, Y., Schapire, R.: A short introduction to boosting. *Journal-Japanese Society For Artificial Intelligence* **14**(771-780), 1612 (1999)
- Friedman, J.H.: Greedy function approximation: a gradient boosting machine. *Annals of statistics*, 1189–1232 (2001)
- Wang, T., Wei, J., Sabatini, D., Lander, E.: Genetic screens in human cells using the CRISPR-Cas9 system. *Nature* **343**, 80–84 (2014)
- Koike-Yusa, H., Li, Y., Tan, E., Mdel, C.V.-H., Yusa, K.: Genome-wide recessive genetic screening in mammalian cells with a lentiviral CRISPR-guide rna library. *Nature Biotechnology* **32**(3), 267–273 (2014)
- Fusi, N., Smith, I., Doench, J., Listgarten, J.: In silico predictive modeling of crispr/cas9 guide efficiency. *bioRxiv* (2015)
- Doench, J., Fusi, N., Sullender, M., Hegde, M., Vaimberg, E., Donovan, K., Smith, I., Tothova, Z., Wilen, C., Orchard, R., Virgin, H., Listgarten, J., Root, D.: Optimized sgRNA design to maximize activity and minimize off-target effects of CRISPR-Cas9. *Nature Biotechnology* **34**(2), 184–191 (2016)
- DeLong, E., DeLong, D., Clarke-Pearson, D.: Comparing the areas under two or more correlated receiver operating characteristic curves: a nonparametric approach. *Biometrics* **44**(837-845) (1988)
- Fisher, R.: On the "probable error" of a coefficient of correlation deduced from a small sample. *Metron* (3-32) (1921)
- Myers, L., Sirois, M.: Spearman correlation coefficients, differences between. *Encyclopedia of Statistical Sciences* **12** (2006)
- Xu, H., Xiao, T., Chen, C., Li, W., Meyer, C., Wu, Q., Wu, D., Cong, L., Zhang, F., Liu, J., Brown, M., Liu, S.: Sequence determinants of improved CRISPR sgRNA design. *Genome Research* **25**, 1147–1157 (2015)

12. Doench, J., Hartenian, E., Graham, D., Tothova, Z., Hegde, M., Smith, I., Sullender, M., Ebert, B., Xavier, R., Root, D.: Rational design of highly active sgrnas for CRISPR-Cas9-mediated gene inactivation. *Nature Biotechnology* 32(12), 1262–1267 (2014)

**Figures**

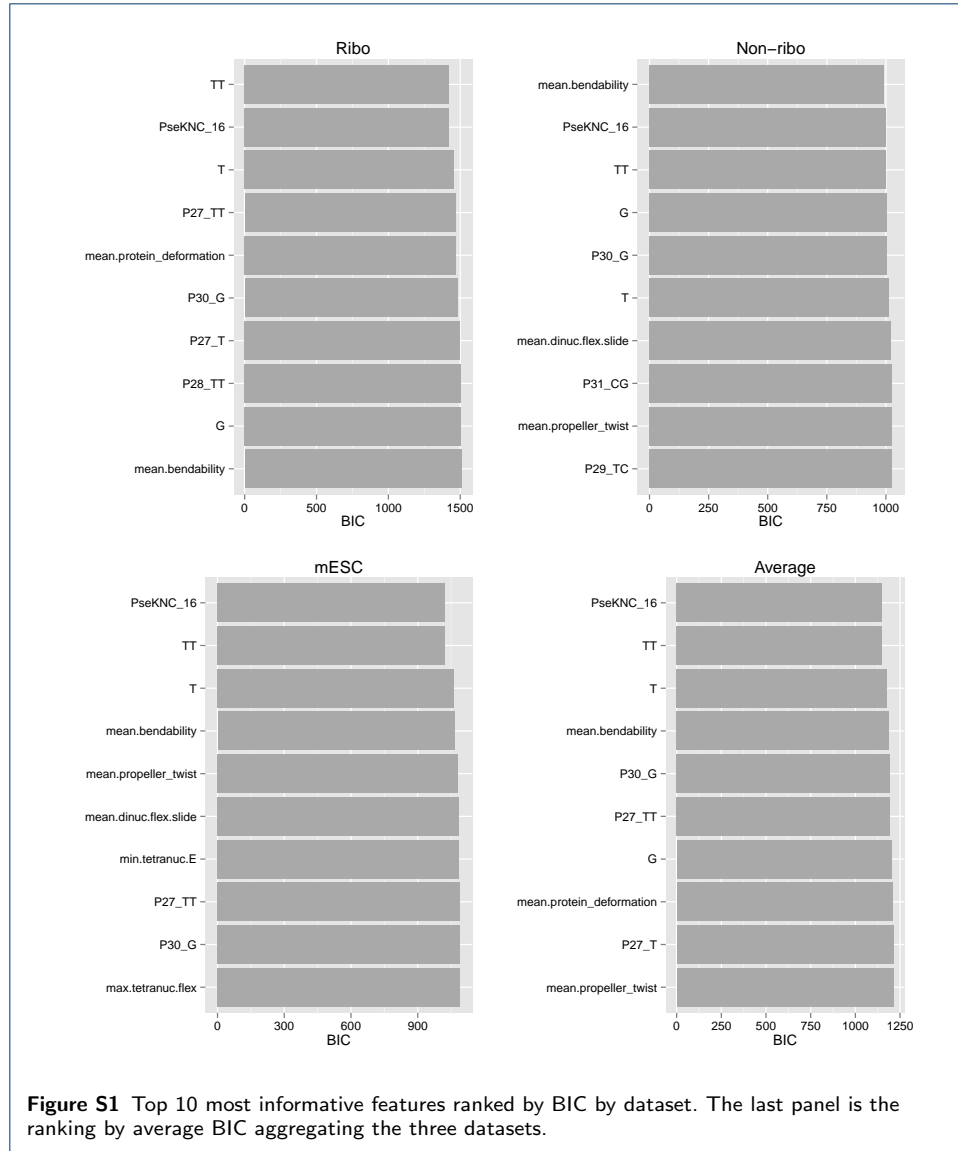

**Tables**

**Table S1** AUC, Youden index ( $J$ ), Sensitivity (Se) and Specificity (Sp) from the 3-way cross validation within dataset 1 (ribosomal genes) using random forest implemented in R package randomForest. Comb Feature: PD Mono+PD Dinuc+PseKNC. We reported the average performance from the 3-way cross validation over 10 iterations of random sampling.

| Feature class | AUC   | $J$   | Se    | Sp    |
|---------------|-------|-------|-------|-------|
| PD Mono       | 0.824 | 0.528 | 0.806 | 0.723 |
| PD Dinuc      | 0.843 | 0.545 | 0.825 | 0.720 |
| Freq          | 0.743 | 0.394 | 0.781 | 0.614 |
| Align         | 0.648 | 0.239 | 0.861 | 0.378 |
| Thermo        | 0.577 | 0.146 | 0.718 | 0.428 |
| Packer        | 0.634 | 0.236 | 0.597 | 0.639 |
| PhyChem       | 0.716 | 0.338 | 0.615 | 0.722 |
| PseKNC        | 0.728 | 0.380 | 0.768 | 0.612 |
| Comb Feature  | 0.863 | 0.594 | 0.793 | 0.801 |

**Table S2** AUC, Youden index ( $J$ ), Sensitivity (Se) and Specificity (Sp) from intra-platform comparison (training set: ribosomal genes, test set: non-ribosomal genes) using random forest implemented in R package randomForest. Comb Feature: PD Mono+PD Dinuc+Thermo+Packer.

| Feature class | AUC   | $J$   | Se    | Sp    |
|---------------|-------|-------|-------|-------|
| PD Mono       | 0.797 | 0.492 | 0.724 | 0.768 |
| PD Dinuc      | 0.783 | 0.452 | 0.781 | 0.671 |
| Freq          | 0.668 | 0.279 | 0.541 | 0.738 |
| Align         | 0.611 | 0.171 | 0.918 | 0.253 |
| Thermo        | 0.554 | 0.085 | 0.866 | 0.219 |
| Packer        | 0.624 | 0.178 | 0.469 | 0.709 |
| PhyChem       | 0.641 | 0.225 | 0.516 | 0.709 |
| PseKNC        | 0.645 | 0.227 | 0.586 | 0.641 |
| Comb Feature  | 0.804 | 0.468 | 0.823 | 0.646 |

**Table S3** AUC, Youden index ( $J$ ), Sensitivity (Se) and Specificity (Sp) from inter-platform comparison (training set: ribosomal and non-ribosomal genes, test set: mESC essential genes) using random forest implemented in R package randomForest. Comb Feature: PD Mono+PD Dinuc+Freq.

| Feature class | AUC   | $J$   | Se    | Sp    |
|---------------|-------|-------|-------|-------|
| PD Mono       | 0.807 | 0.484 | 0.753 | 0.731 |
| PD Dinuc      | 0.830 | 0.548 | 0.864 | 0.684 |
| Freq          | 0.697 | 0.303 | 0.790 | 0.513 |
| Align         | 0.536 | 0.076 | 0.623 | 0.453 |
| Thermo        | 0.568 | 0.127 | 0.516 | 0.611 |
| Packer        | 0.657 | 0.239 | 0.696 | 0.543 |
| PhyChem       | 0.703 | 0.311 | 0.769 | 0.543 |
| PseKNC        | 0.712 | 0.334 | 0.573 | 0.761 |
| Comb Feature  | 0.843 | 0.566 | 0.780 | 0.786 |

**Table S4** AUC, Youden index ( $J$ ), Sensitivity (Se) and Specificity (Sp) from the 3-way cross validation within dataset 1 (ribosomal genes) using boosted regression implemented in R package gbm. Comb Feature: PD Mono+PD Dinuc+Thermo+PhyChem. We reported the average performance from the 3-way cross validation over 10 iterations of random sampling.

| Feature class | AUC   | $J$   | Se    | Sp    |
|---------------|-------|-------|-------|-------|
| PD Mono       | 0.820 | 0.523 | 0.832 | 0.691 |
| PD Dinuc      | 0.827 | 0.507 | 0.768 | 0.738 |
| Freq          | 0.749 | 0.411 | 0.729 | 0.682 |
| Align         | 0.642 | 0.254 | 0.825 | 0.429 |
| Thermo        | 0.607 | 0.197 | 0.586 | 0.611 |
| Packer        | 0.625 | 0.205 | 0.712 | 0.493 |
| PhyChem       | 0.730 | 0.351 | 0.652 | 0.699 |
| PseKNC        | 0.736 | 0.396 | 0.727 | 0.669 |
| Comb Feature  | 0.860 | 0.578 | 0.781 | 0.797 |

**Table S5** AUC, Youden index ( $J$ ), Sensitivity (Se) and Specificity (Sp) from intra-platform comparison (training set: ribosomal genes, test set: non-ribosomal genes) using boosted regression implemented in R package `gbm`. Comb Feature: PD Mono+PD Dinuc+Freq+Align+Thermo+Packer.

| Feature class | AUC   | $J$   | Se    | Sp    |
|---------------|-------|-------|-------|-------|
| PD Mono       | 0.784 | 0.446 | 0.754 | 0.692 |
| PD Dinuc      | 0.788 | 0.460 | 0.827 | 0.633 |
| Freq          | 0.656 | 0.251 | 0.766 | 0.485 |
| Align         | 0.618 | 0.193 | 0.835 | 0.359 |
| Thermo        | 0.564 | 0.115 | 0.317 | 0.797 |
| Packer        | 0.638 | 0.213 | 0.513 | 0.700 |
| PhyChem       | 0.636 | 0.212 | 0.617 | 0.595 |
| PseKNC        | 0.638 | 0.208 | 0.744 | 0.464 |
| Comb Feature  | 0.812 | 0.493 | 0.784 | 0.709 |

**Table S6** AUC, Youden index ( $J$ ), Sensitivity (Se) and Specificity (Sp) from inter-platform comparison (training set: ribosomal and non-ribosomal genes, test set: mESC essential genes) using boosted regression implemented in R package `gbm`. Comb Feature: PD Mono+PD Dinuc+Freq+Thermo+Packer.

| Feature class | AUC   | $J$   | Se    | Sp    |
|---------------|-------|-------|-------|-------|
| PD Mono       | 0.798 | 0.479 | 0.748 | 0.731 |
| PD Dinuc      | 0.827 | 0.528 | 0.801 | 0.726 |
| Freq          | 0.721 | 0.328 | 0.849 | 0.479 |
| Align         | 0.568 | 0.144 | 0.477 | 0.667 |
| Thermo        | 0.623 | 0.215 | 0.651 | 0.564 |
| Packer        | 0.667 | 0.241 | 0.793 | 0.449 |
| PhyChem       | 0.710 | 0.331 | 0.669 | 0.662 |
| PseKNC        | 0.717 | 0.347 | 0.684 | 0.662 |
| Comb Feature  | 0.849 | 0.586 | 0.855 | 0.731 |

**Table S7** AUC, Youden index ( $J$ ), Sensitivity (Se), Specificity (Sp), Pearson's correlation coefficient ( $r$ ), Spearman's rank correlation coefficient ( $s$ ) and Mean squared error (Mse) from the 3-way cross validation within dataset 1 (ribosomal genes) using elastic net implemented in R package `glmnet`. Comb Feature A (maximum  $s$ ): PD Mono+PD Dinuc +Thermo+Packer+PhyChem+PseKNC. Comb Feature B (maximum  $r$ ): PD Mono+PD Dinuc +Thermo+Packer+PhyChem+PseKNC. Comb Feature C (minimum Mse): PD Mono+PD Dinuc +Freq+Align+Thermo+Packer+PseKNC. Comb Feature D (maximum AUC): PD Mono+PD Dinuc +Thermo+PseKNC. We reported the average performance from the 3-way cross validation over 10 iterations of random sampling.

| Feature class  | AUC   | $J$   | Se    | Sp    | $r$   | $s$   | Mse  |
|----------------|-------|-------|-------|-------|-------|-------|------|
| PD Mono        | 0.828 | 0.553 | 0.843 | 0.711 | 0.559 | 0.548 | 1.56 |
| PD Dinuc       | 0.857 | 0.595 | 0.861 | 0.734 | 0.616 | 0.599 | 1.44 |
| Freq           | 0.777 | 0.433 | 0.616 | 0.818 | 0.487 | 0.479 | 1.70 |
| Align          | 0.603 | 0.185 | 0.808 | 0.376 | 0.196 | 0.184 | 2.18 |
| Thermo         | 0.565 | 0.142 | 0.737 | 0.405 | 0.128 | 0.118 | 2.19 |
| Packer         | 0.600 | 0.179 | 0.545 | 0.634 | 0.203 | 0.203 | 2.16 |
| PhyChem        | 0.731 | 0.380 | 0.746 | 0.634 | 0.418 | 0.409 | 1.85 |
| PseKNC         | 0.728 | 0.376 | 0.635 | 0.741 | 0.403 | 0.387 | 1.89 |
| Comb Feature A | 0.878 | 0.622 | 0.836 | 0.785 | 0.644 | 0.628 | 1.37 |
| Comb Feature B | 0.878 | 0.622 | 0.836 | 0.785 | 0.644 | 0.628 | 1.37 |
| Comb Feature C | 0.875 | 0.614 | 0.837 | 0.777 | 0.640 | 0.624 | 1.36 |
| Comb Feature D | 0.879 | 0.636 | 0.866 | 0.770 | 0.643 | 0.627 | 1.38 |

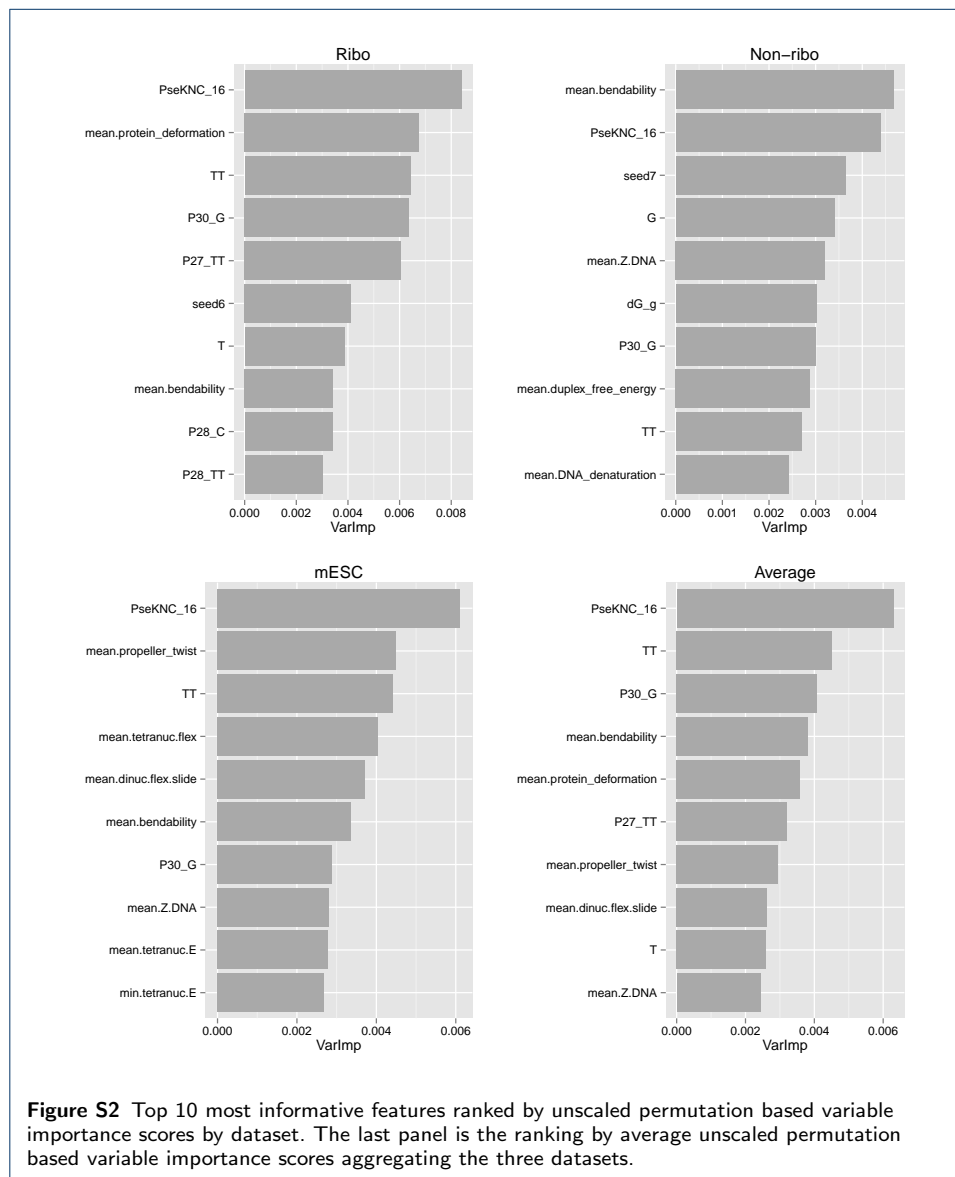

**Table S8** AUC, Youden index ( $J$ ), Sensitivity (Se), Specificity (Sp), Pearson's correlation coefficient ( $r$ ), Spearman's rank correlation coefficient ( $s$ ) and Mean squared error (Mse) from intra-platform comparison (training set: ribosomal genes, test set: non-ribosomal genes) using elastic net implemented in R package `glmnet`. Comb Feature A (maximum  $s$ ): PD Mono+PD Dinuc+Freq+Thermo+Packer. Comb Feature B (maximum  $r$ ): PD Mono+PD Dinuc+Freq+Thermo+Packer. Comb Feature C (minimum Mse): PD Mono+PD Dinuc+Freq+Thermo+Packer+PseKNC. Comb Feature D (maximum AUC): PD Mono+PD Dinuc+Freq+Thermo+Packer.

| Feature class  | AUC   | $J$   | Se    | Sp    | $r$   | $s$   | Mse  |
|----------------|-------|-------|-------|-------|-------|-------|------|
| PD Mono        | 0.780 | 0.432 | 0.697 | 0.734 | 0.459 | 0.436 | 1.36 |
| PD Dinuc       | 0.799 | 0.492 | 0.787 | 0.705 | 0.480 | 0.429 | 1.30 |
| Freq           | 0.713 | 0.351 | 0.790 | 0.561 | 0.351 | 0.310 | 1.51 |
| Align          | 0.579 | 0.166 | 0.879 | 0.287 | 0.142 | 0.105 | 1.70 |
| Thermo         | 0.596 | 0.172 | 0.535 | 0.637 | 0.147 | 0.129 | 1.72 |
| Packer         | 0.641 | 0.231 | 0.510 | 0.722 | 0.210 | 0.174 | 1.62 |
| PhyChem        | 0.661 | 0.249 | 0.599 | 0.650 | 0.260 | 0.206 | 1.61 |
| PseKNC         | 0.649 | 0.241 | 0.642 | 0.599 | 0.249 | 0.191 | 1.59 |
| Comb Feature A | 0.816 | 0.536 | 0.832 | 0.705 | 0.516 | 0.466 | 1.25 |
| Comb Feature B | 0.816 | 0.536 | 0.832 | 0.705 | 0.516 | 0.466 | 1.25 |
| Comb Feature C | 0.814 | 0.541 | 0.849 | 0.692 | 0.515 | 0.463 | 1.25 |
| Comb Feature D | 0.816 | 0.536 | 0.832 | 0.705 | 0.516 | 0.466 | 1.25 |

**Table S9** AUC, Youden index ( $J$ ), Sensitivity (Se), Specificity (Sp), Pearson's correlation coefficient ( $r$ ), Spearman's rank correlation coefficient ( $s$ ) and Mean squared error (Mse) from inter-platform comparison (training set: ribosomal and non-ribosomal genes, test set: mESC essential genes) using elastic net implemented in R package `glmnet`. Comb Feature A (maximum  $s$ ): PD Mono+PD Dinuc +Align+Thermo+PhyChem. Comb Feature B (maximum  $r$ ): PD Mono+PD Dinuc +Thermo+Packer+PhyChem. Comb Feature C (minimum Mse): PD Mono+Thermo+Packer. Comb Feature D (maximum AUC): PD Mono+PD Dinuc +Freq+PhyChem. Mse for azimuth and sgRNA Scorer are not computed due to scale difference.

| Feature class  | AUC   | $J$   | Se    | Sp    | $r$   | $s$   | Mse  |
|----------------|-------|-------|-------|-------|-------|-------|------|
| PD Mono        | 0.798 | 0.497 | 0.783 | 0.714 | 0.395 | 0.300 | 4.38 |
| PD Dinuc       | 0.831 | 0.530 | 0.773 | 0.756 | 0.492 | 0.374 | 4.21 |
| Freq           | 0.750 | 0.381 | 0.714 | 0.667 | 0.328 | 0.223 | 4.87 |
| Align          | 0.579 | 0.156 | 0.498 | 0.658 | 0.093 | 0.071 | 5.49 |
| Thermo         | 0.639 | 0.253 | 0.778 | 0.474 | 0.155 | 0.043 | 5.04 |
| Packer         | 0.661 | 0.242 | 0.580 | 0.662 | 0.157 | 0.071 | 4.90 |
| PhyChem        | 0.719 | 0.344 | 0.694 | 0.650 | 0.268 | 0.170 | 4.87 |
| PseKNC         | 0.734 | 0.364 | 0.736 | 0.628 | 0.282 | 0.149 | 4.78 |
| Comb Feature A | 0.843 | 0.553 | 0.843 | 0.709 | 0.506 | 0.383 | 4.08 |
| Comb Feature B | 0.844 | 0.561 | 0.808 | 0.752 | 0.506 | 0.382 | 4.09 |
| Comb Feature C | 0.815 | 0.507 | 0.717 | 0.791 | 0.439 | 0.336 | 3.71 |
| Comb Feature D | 0.847 | 0.564 | 0.799 | 0.765 | 0.503 | 0.372 | 4.19 |
| azimuth        | 0.795 | 0.463 | 0.857 | 0.607 | 0.468 | 0.388 | NA   |
| sgRNA Scorer   | 0.669 | 0.288 | 0.548 | 0.739 | 0.195 | 0.128 | NA   |

**Table S10** AUC, Youden index ( $J$ ), Sensitivity (Se), Specificity (Sp), Pearson's correlation coefficient ( $r$ ), Spearman's rank correlation coefficient ( $s$ ) and Mean squared error (Mse) from the 3-way cross validation within dataset 1 (ribosomal genes) using random forest implemented in R package `randomForest`. Comb Feature A (maximum  $s$ ): PD Mono+PD Dinuc +Freq+Thermo. Comb Feature B (maximum  $r$ ): PD Mono+PD Dinuc +Freq+Thermo. Comb Feature C (minimum Mse): PD Mono+PD Dinuc +Freq. Comb Feature D (maximum AUC): PD Mono+PD Dinuc +Freq+Thermo. We reported the average performance from the 3-way cross validation over 10 iterations of random sampling.

| Feature class  | AUC   | $J$   | Se    | Sp    | $r$   | $s$   | Mse   |
|----------------|-------|-------|-------|-------|-------|-------|-------|
| PD Mono        | 0.825 | 0.550 | 0.790 | 0.761 | 0.561 | 0.543 | 1.577 |
| PD Dinuc       | 0.836 | 0.532 | 0.756 | 0.776 | 0.573 | 0.542 | 1.539 |
| Freq           | 0.748 | 0.392 | 0.771 | 0.622 | 0.436 | 0.423 | 1.811 |
| Align          | 0.641 | 0.256 | 0.698 | 0.557 | 0.270 | 0.226 | 2.079 |
| Thermo         | 0.587 | 0.167 | 0.736 | 0.432 | 0.163 | 0.148 | 2.235 |
| Packer         | 0.640 | 0.232 | 0.521 | 0.711 | 0.244 | 0.245 | 2.100 |
| PhyChem        | 0.720 | 0.347 | 0.635 | 0.711 | 0.406 | 0.398 | 1.869 |
| PseKNC         | 0.726 | 0.375 | 0.751 | 0.624 | 0.409 | 0.400 | 1.858 |
| Comb Feature A | 0.864 | 0.602 | 0.864 | 0.738 | 0.637 | 0.613 | 1.439 |
| Comb Feature B | 0.864 | 0.602 | 0.864 | 0.738 | 0.637 | 0.613 | 1.439 |
| Comb Feature C | 0.860 | 0.595 | 0.782 | 0.813 | 0.630 | 0.604 | 1.436 |
| Comb Feature D | 0.864 | 0.602 | 0.864 | 0.738 | 0.637 | 0.613 | 1.439 |

**Table S11** AUC, Youden index ( $J$ ), Sensitivity (Se), Specificity (Sp), Pearson's correlation coefficient ( $r$ ), Spearman's rank correlation coefficient ( $s$ ) and Mean squared error (Mse) from intra-platform comparison (training set: ribosomal genes, test set: non-ribosomal genes) using random forest implemented in R package `randomForest`. Comb Feature A (maximum  $s$ ): PD Mono+PD Dinuc +Packer. Comb Feature B (maximum  $r$ ): PD Mono+PD Dinuc +Packer. Comb Feature C (minimum Mse): PD Mono+PD Dinuc +Freq+Align+Packer. Comb Feature D (maximum AUC): PD Mono+PD Dinuc +Packer.

| Feature class  | AUC   | $J$   | Se    | Sp    | $r$   | $s$   | Mse   |
|----------------|-------|-------|-------|-------|-------|-------|-------|
| PD Mono        | 0.790 | 0.465 | 0.832 | 0.633 | 0.494 | 0.444 | 1.272 |
| PD Dinuc       | 0.773 | 0.433 | 0.791 | 0.641 | 0.444 | 0.381 | 1.357 |
| Freq           | 0.672 | 0.270 | 0.726 | 0.544 | 0.269 | 0.233 | 1.610 |
| Align          | 0.599 | 0.182 | 0.908 | 0.274 | 0.210 | 0.157 | 1.688 |
| Thermo         | 0.572 | 0.122 | 0.291 | 0.831 | 0.122 | 0.116 | 1.817 |
| Packer         | 0.632 | 0.202 | 0.434 | 0.768 | 0.215 | 0.190 | 1.638 |
| PhyChem        | 0.638 | 0.217 | 0.575 | 0.641 | 0.208 | 0.179 | 1.757 |
| PseKNC         | 0.653 | 0.234 | 0.639 | 0.595 | 0.240 | 0.212 | 1.637 |
| Comb Feature A | 0.804 | 0.478 | 0.744 | 0.734 | 0.519 | 0.459 | 1.238 |
| Comb Feature B | 0.804 | 0.478 | 0.744 | 0.734 | 0.519 | 0.459 | 1.238 |
| Comb Feature C | 0.801 | 0.479 | 0.791 | 0.688 | 0.518 | 0.454 | 1.234 |
| Comb Feature D | 0.804 | 0.478 | 0.744 | 0.734 | 0.519 | 0.459 | 1.238 |

**Table S12** AUC, Youden index ( $J$ ), Sensitivity (Se), Specificity (Sp), Pearson's correlation coefficient ( $r$ ), Spearman's rank correlation coefficient ( $s$ ) and Mean squared error (Mse) from inter-platform comparison (training set: ribosomal and non-ribosomal genes, test set: mESC essential genes) using random forest implemented in R package `randomForest`. Comb Feature A (maximum  $s$ ): PD Mono+PD Dinuc +Freq+PhyChem. Comb Feature B (maximum  $r$ ): PD Mono+PD Dinuc +Freq+Packer. Comb Feature C (minimum Mse): PD Mono+PD Dinuc +Freq+PhyChem. Comb Feature D (maximum AUC): PD Mono+PD Dinuc +Freq+Packer.

| Feature class  | AUC   | $J$   | Se    | Sp    | $r$   | $s$   | Mse   |
|----------------|-------|-------|-------|-------|-------|-------|-------|
| PD Mono        | 0.784 | 0.456 | 0.789 | 0.667 | 0.428 | 0.315 | 4.332 |
| PD Dinuc       | 0.823 | 0.517 | 0.769 | 0.748 | 0.486 | 0.351 | 4.236 |
| Freq           | 0.701 | 0.311 | 0.863 | 0.449 | 0.277 | 0.184 | 4.743 |
| Align          | 0.540 | 0.096 | 0.280 | 0.816 | 0.065 | 0.062 | 7.180 |
| Thermo         | 0.537 | 0.104 | 0.839 | 0.265 | 0.148 | 0.124 | 4.929 |
| Packer         | 0.663 | 0.282 | 0.680 | 0.603 | 0.208 | 0.135 | 4.801 |
| PhyChem        | 0.704 | 0.342 | 0.705 | 0.637 | 0.275 | 0.195 | 4.799 |
| PseKNC         | 0.714 | 0.339 | 0.617 | 0.722 | 0.247 | 0.148 | 5.118 |
| Comb Feature A | 0.830 | 0.559 | 0.849 | 0.709 | 0.502 | 0.378 | 4.093 |
| Comb Feature B | 0.838 | 0.576 | 0.863 | 0.714 | 0.509 | 0.363 | 4.104 |
| Comb Feature C | 0.830 | 0.559 | 0.849 | 0.709 | 0.502 | 0.378 | 4.093 |
| Comb Feature D | 0.838 | 0.576 | 0.863 | 0.714 | 0.509 | 0.363 | 4.104 |

**Table S13** AUC, Youden index ( $J$ ), Sensitivity (Se), Specificity (Sp), Pearson's correlation coefficient ( $r$ ), Spearman's rank correlation coefficient ( $s$ ) and Mean squared error (Mse) from the 3-way cross validation within dataset 1 (ribosomal genes) using boosted regression implemented in R package `gbm`. Comb Feature A (maximum  $s$ ): PD Mono+PD Dinuc +Thermo+PhyChem. Comb Feature B (maximum  $r$ ): PD Mono+PD Dinuc +Thermo+PhyChem. Comb Feature C (minimum Mse): PD Mono+PD Dinuc +Freq+Thermo+PhyChem. Comb Feature D (maximum AUC): PD Mono+PD Dinuc +Thermo. We reported the average performance from the 3-way cross validation over 10 iterations of random sampling.

| Feature class  | AUC   | $J$   | Se    | Sp    | $r$   | $s$   | Mse   |
|----------------|-------|-------|-------|-------|-------|-------|-------|
| PD Mono        | 0.822 | 0.531 | 0.843 | 0.688 | 0.543 | 0.534 | 1.618 |
| PD Dinuc       | 0.844 | 0.530 | 0.743 | 0.787 | 0.579 | 0.565 | 1.609 |
| Freq           | 0.749 | 0.409 | 0.732 | 0.677 | 0.446 | 0.432 | 1.787 |
| Align          | 0.643 | 0.256 | 0.808 | 0.449 | 0.298 | 0.243 | 2.057 |
| Thermo         | 0.598 | 0.187 | 0.705 | 0.483 | 0.179 | 0.165 | 2.176 |
| Packer         | 0.630 | 0.210 | 0.646 | 0.564 | 0.243 | 0.234 | 2.101 |
| PhyChem        | 0.732 | 0.353 | 0.598 | 0.755 | 0.430 | 0.419 | 1.818 |
| PseKNC         | 0.738 | 0.394 | 0.759 | 0.635 | 0.424 | 0.411 | 1.835 |
| Comb Feature A | 0.858 | 0.583 | 0.778 | 0.805 | 0.616 | 0.602 | 1.454 |
| Comb Feature B | 0.858 | 0.583 | 0.778 | 0.805 | 0.616 | 0.602 | 1.454 |
| Comb Feature C | 0.857 | 0.595 | 0.795 | 0.800 | 0.613 | 0.600 | 1.452 |
| Comb Feature D | 0.859 | 0.603 | 0.810 | 0.793 | 0.604 | 0.590 | 1.521 |



**Table S14** AUC, Youden index ( $J$ ), Sensitivity (Se), Specificity (Sp), Pearson's correlation coefficient ( $r$ ), Spearman's rank correlation coefficient ( $s$ ) and Mean squared error (Mse) from intra-platform comparison (training set: ribosomal genes, test set: non-ribosomal genes) using boosted regression implemented in R package gbm. Comb Feature A (maximum  $s$ ): PD Mono+PD Dinuc +Packer. Comb Feature B (maximum  $r$ ): PD Mono+PD Dinuc +Align+Packer. Comb Feature C (minimum Mse): PD Mono+PD Dinuc +Freq+Align+Packer. Comb Feature D (maximum AUC): PD Mono+PD Dinuc +Packer.

| Feature class  | AUC   | $J$   | Se    | Sp    | $r$   | $s$   | Mse   |
|----------------|-------|-------|-------|-------|-------|-------|-------|
| PD Mono        | 0.771 | 0.416 | 0.724 | 0.692 | 0.447 | 0.424 | 1.350 |
| PD Dinuc       | 0.757 | 0.387 | 0.729 | 0.658 | 0.424 | 0.364 | 1.403 |
| Freq           | 0.657 | 0.256 | 0.733 | 0.523 | 0.250 | 0.206 | 1.629 |
| Align          | 0.600 | 0.195 | 0.875 | 0.321 | 0.231 | 0.145 | 1.638 |
| Thermo         | 0.568 | 0.119 | 0.520 | 0.599 | 0.142 | 0.142 | 1.703 |
| Packer         | 0.638 | 0.217 | 0.432 | 0.785 | 0.226 | 0.196 | 1.615 |
| PhyChem        | 0.644 | 0.230 | 0.656 | 0.574 | 0.232 | 0.196 | 1.673 |
| PseKNC         | 0.643 | 0.207 | 0.823 | 0.384 | 0.236 | 0.185 | 1.641 |
| Comb Feature A | 0.795 | 0.476 | 0.779 | 0.696 | 0.488 | 0.446 | 1.291 |
| Comb Feature B | 0.793 | 0.459 | 0.890 | 0.570 | 0.492 | 0.442 | 1.282 |
| Comb Feature C | 0.792 | 0.474 | 0.870 | 0.603 | 0.489 | 0.438 | 1.280 |
| Comb Feature D | 0.795 | 0.476 | 0.779 | 0.696 | 0.488 | 0.446 | 1.291 |

**Table S15** AUC, Youden index ( $J$ ), Sensitivity (Se), Specificity (Sp), Pearson's correlation coefficient ( $r$ ), Spearman's rank correlation coefficient ( $s$ ) and Mean squared error (Mse) from inter-platform comparison (training set: ribosomal and non-ribosomal genes, test set: mESC essential genes) using boosted regression implemented in R package gbm. Comb Feature A (maximum  $s$ ): PD Mono+PD Dinuc +Freq+Thermo+PhyChem. Comb Feature B (maximum  $r$ ): PD Mono+PD Dinuc +Freq+Thermo+PhyChem. Comb Feature C (minimum Mse): PD Mono+PD Dinuc +Freq+Thermo+Packer. Comb Feature D (maximum AUC): PD Mono+PD Dinuc +Freq+Thermo+Packer.

| Feature class  | AUC   | $J$   | Se    | Sp    | $r$   | $s$   | Mse   |
|----------------|-------|-------|-------|-------|-------|-------|-------|
| PD Mono        | 0.788 | 0.470 | 0.748 | 0.722 | 0.384 | 0.292 | 4.442 |
| PD Dinuc       | 0.810 | 0.477 | 0.853 | 0.624 | 0.468 | 0.334 | 4.354 |
| Freq           | 0.724 | 0.345 | 0.759 | 0.585 | 0.281 | 0.165 | 4.714 |
| Align          | 0.571 | 0.138 | 0.480 | 0.658 | 0.098 | 0.087 | 7.007 |
| Thermo         | 0.626 | 0.233 | 0.780 | 0.453 | 0.183 | 0.059 | 5.067 |
| Packer         | 0.665 | 0.247 | 0.863 | 0.385 | 0.204 | 0.111 | 4.830 |
| PhyChem        | 0.705 | 0.321 | 0.748 | 0.573 | 0.265 | 0.156 | 4.818 |
| PseKNC         | 0.714 | 0.338 | 0.616 | 0.722 | 0.233 | 0.132 | 5.303 |
| Comb Feature A | 0.826 | 0.538 | 0.846 | 0.692 | 0.479 | 0.338 | 4.186 |
| Comb Feature B | 0.826 | 0.538 | 0.846 | 0.692 | 0.479 | 0.338 | 4.186 |
| Comb Feature C | 0.829 | 0.533 | 0.755 | 0.778 | 0.476 | 0.327 | 4.146 |
| Comb Feature D | 0.829 | 0.533 | 0.755 | 0.778 | 0.476 | 0.327 | 4.146 |

**Table S16** AUC, Youden index ( $J$ ), Sensitivity (Se) and Specificity (Sp) from the 3-way cross validation within dataset 1 (ribosomal genes) using elastic net for 40bp and 30bp sequences.

| Feature class | AUC (40bp) | AUC (30bp) |
|---------------|------------|------------|
| PD Mono       | 0.826      | 0.831      |
| PD Dinuc      | 0.858      | 0.864      |

**Table S17** AUC, Youden index ( $J$ ), Sensitivity (Se) and Specificity (Sp) from intra-platform comparison (training set: ribosomal genes, test set: non-ribosomal genes) using elastic net for 40bp and 30bp sequences.

| Feature class | AUC (40bp) | AUC (30bp) |
|---------------|------------|------------|
| PD Mono       | 0.785      | 0.783      |
| PD Dinuc      | 0.792      | 0.792      |

**Table S18** AUC, Youden index ( $J$ ), Sensitivity (Se) and Specificity (Sp) from inter-platform comparison (training set: ribosomal and non-ribosomal genes from, test set: mESC essential genes) using elastic net for 40bp and 30bp sequences.

| Feature class | AUC (40bp) | AUC (30bp) |
|---------------|------------|------------|
| PD Mono       | 0.797      | 0.795      |
| PD Dinuc      | 0.832      | 0.830      |

**Table S19** AUC, Youden index ( $J$ ), Sensitivity (Se) and Specificity (Sp) from leave-one-gene out prediction within dataset 1 (ribosomal genes) using elastic net classification.

| Feature class | AUC   | $J$   | Se    | Sp    |
|---------------|-------|-------|-------|-------|
| PD Mono       | 0.839 | 0.543 | 0.840 | 0.703 |
| PD Dinuc      | 0.873 | 0.604 | 0.796 | 0.808 |
| Freq          | 0.780 | 0.430 | 0.692 | 0.737 |
| Align         | 0.611 | 0.177 | 0.599 | 0.578 |
| Thermo        | 0.520 | 0.068 | 0.922 | 0.146 |
| Packer        | 0.603 | 0.177 | 0.572 | 0.605 |
| PhyChem       | 0.728 | 0.357 | 0.791 | 0.566 |
| PseKNC        | 0.738 | 0.380 | 0.715 | 0.664 |
| Comb Feature  | 0.883 | 0.623 | 0.844 | 0.779 |

**Table S20** AUC, Youden index ( $J$ ), Sensitivity (Se) and Specificity (Sp) from leave-one-gene out prediction in [4] data (i.e., dataset 1+dataset 2) using elastic net classification.

| Feature class | AUC   | $J$   | Se    | Sp    |
|---------------|-------|-------|-------|-------|
| PD Mono       | 0.822 | 0.510 | 0.830 | 0.680 |
| PD Dinuc      | 0.848 | 0.567 | 0.828 | 0.738 |
| Freq          | 0.771 | 0.423 | 0.700 | 0.724 |
| Align         | 0.595 | 0.151 | 0.650 | 0.501 |
| Thermo        | 0.584 | 0.145 | 0.622 | 0.524 |
| Packer        | 0.623 | 0.184 | 0.647 | 0.537 |
| PhyChem       | 0.715 | 0.342 | 0.765 | 0.577 |
| PseKNC        | 0.720 | 0.342 | 0.752 | 0.590 |
| Comb Feature  | 0.857 | 0.581 | 0.863 | 0.719 |
